# Supplementary material for: COVID-19 Rebound After VV116 vs Nirmatrelvir-Ritonavir Treatment: A Randomized Clinical Trial
Source: PubMed Central journal article supplement (PMC10938176; doi:10.1001/jamanetworkopen.2024.1765), 2024-03-13
Supplement: jamanetwopen-e241765-s002.pdf [file jamanetwopen-e241765-s002.pdf]

## Supplementary Online Content

Yang Z, Xu Y, Zheng R, et al. COVID-19 rebound after VV116 vs nirmatrelvir-ritonavir treatment: a randomized clinical trial. *JAMA Netw Open*. 2024;7(3):e241765.

doi:10.1001/jamanetworkopen.2024.1765

**eMethods.** Genome Sequencing Procedures

**eReferences.**

**eTable 1.** Primary and Secondary Outcomes in the Per Protocol Set

**eTable 2.** Post-Hoc Analysis of Characteristics Associated With Viral Rebound Rate

**eTable 3.** Post-Hoc Analysis of Characteristics Associated With Viral Rebound Rate in VV116 Group

**eTable 4.** Post-Hoc Analysis of Characteristics Associated With Viral Rebound Rate in Nirmatrelvir-Ritonavir Group

**eTable 5.** Adverse Events in the Safety Analysis Set

**eTable 6.** Whole-Genome Sequencing of SARS-CoV-2 in 24 Cases

**eFigure 1.** Enrollment of Study Participants

**eFigure 2.** Median (Interquartile Range) Score for COVID-19–Related Target Symptoms in Patients Receiving VV116 or Nirmatrelvir-Ritonavir by Follow-Up Days

**eFigure 3.** Trajectories of Viral Copy Numbers (log<sub>10</sub>-Transformed) by Groups of Rebound and Not Rebound

**eFigure 4.** SARS-CoV-2 Variants, Ct Values, and Symptom Scores in 24 Cases

This supplementary material has been provided by the authors to give readers additional information about their work.

## **eMethods.** Genome Sequencing Procedures

RNA extraction and targeting sequencing of SARS-CoV-2: RNA was extracted from swab samples using the Pre-assembled Nucleic Extraction Kit (Magnetic Beads Method) following the manufacturer's instructions (Shanghai BioGerm Medical Technology Co., Ltd, Shanghai, China). The SARS-CoV-2 amplicon library was obtained with the Illumina COVIDSeq ARTIC V4.1 kit following the manufacturer's instructions (Illumina, Inc.). The libraries were sequenced at the MGISEQ 2000AR platform (MGI Tech Co., Ltd, Shenzhen, China) according to PE 150bp protocol. Prior to subsequent analysis, sequencing reads were trimmed using FASTP (version 0.23.2) to remove low-quality regions, adapter sequences, and sequencing primers.

Viral genomic analysis: Sequenced reads were mapped to the reference genome of SARS-CoV-2 (NCBI Accession: NC\_045512.2) using BOWTIE2 (v2.4.4),<sup>1</sup> a kmer-based algorithm. In this study, all mapped reads were trimmed and piled up for consensus assembly and variation calls using iVar (1.3.1).<sup>2</sup> nf-core/viralrecon (v2.5) pipeline was used to coordinate software modules.<sup>3</sup> Lineage analysis was performed by Nextclade (v2.11.0).<sup>4</sup> Bioinformatics analyses were performed on the NRCTM ASTRA supercomputing platform.

### eReferences.

- 1 Langmead B, Salzberg SL. Fast gapped-read alignment with Bowtie 2. *Nature Methods*. 2012; **9**: 357–359.
- 2 Grubaugh ND, Gangavarapu K, Quick J, et al. An amplicon-based sequencing framework for accurately measuring intrahost virus diversity using PrimalSeq and iVar. *Genome Biol* 2019; **20**: 8.
- 3 Ewels PA, Peltzer A, Fillinger S, et al. The nf-core framework for community-curated bioinformatics pipelines. *Nat Biotechnol*. 2020; **38**: 276–278.
- 4 Aksamentov I, Roemer C, Hodcroft EB, Neher RA. Nextclade: clade assignment, mutation calling and quality control for viral genomes. *Journal of Open Source Software*. 2021; **6**: 3773.

**eTable 1. Primary and Secondary Outcomes in the Per Protocol Set**

| <b>Outcomes</b>                                                         | <b>VV116<br/>(N = 146)</b> | <b>Nirmatrelvir-<br/>ritonavir<br/>(N = 159)</b> | <b>p value</b> |
|-------------------------------------------------------------------------|----------------------------|--------------------------------------------------|----------------|
| <b>Primary outcome</b>                                                  |                            |                                                  |                |
| Viral rebound - no. (%)                                                 | 29 (19.9%)                 | 37 (23.3%)                                       | 0.470          |
| <b>Secondary outcomes</b>                                               |                            |                                                  |                |
| Reduction in Ct value $\geq 1.5$ - no. (%)                              | 34 (22.6%)                 | 33 (21.4%)                                       | 0.594          |
| Median time to viral rebound since treatment completion (95% CI) - days | 8 (8 - 10)                 | 10 (8 - 10)                                      | 0.654          |
| Viral rebound within 7 days after treatment completion - no. (%)        | 26 (17.8%)                 | 33 (20.8%)                                       | 0.515          |
| Viral rebound within 14 days after treatment completion - no. (%)       | 29 (19.9%)                 | 35 (22.0%)                                       | 0.645          |
| Viral rebound within 21 days after treatment completion - no. (%)       | 29 (19.9%)                 | 36 (22.6%)                                       | 0.554          |
| Viral rebound within 28 days after treatment completion - no. (%)       | 29 (19.9%)                 | 36 (22.6%)                                       | 0.554          |
| Symptom aggregation - no. (%)*                                          | 36 (24.8%)                 | 33 (21.7%)                                       | 0.525          |
| Sustained symptom aggregation - no. (%)*                                | 17 (11.7%)                 | 15 (9.9%)                                        | 0.606          |

\* Eight participants were not included in the analysis due to missing symptom score at day 6.

**eTable 2. Post-Hoc Analysis of Characteristics Associated With Viral Rebound Rate**

| Characteristics                                                           | No. of VLR/No. of participants (%) | Unadjusted OR (95% CI)    | Adjusted OR (95% CI) <sup>#</sup> |
|---------------------------------------------------------------------------|------------------------------------|---------------------------|-----------------------------------|
| Doses of study drug                                                       |                                    |                           |                                   |
| < 5                                                                       | 5/32 (15.6%)                       | 1.00 (Reference)          | 1.00 (Reference)                  |
| 5-7                                                                       | 6/22 (27.3%)                       | 1.41 (0.53 – 3.77)        | 0.98 (0.33 – 2.96)                |
| 8-10                                                                      | 61/291 (21.0%)                     | 0.70 (0.26 – 1.89)        | 0.68 (0.24 – 1.97)                |
| <i>P</i> for trend *                                                      | 0.672                              | /                         | /                                 |
| Age categories                                                            |                                    |                           |                                   |
| Age < 40 years                                                            | 12/88 (13.6%)                      | 1.00 (Reference)          | 1.00 (Reference)                  |
| Age 40-49 years                                                           | 12/68 (17.8%)                      | 1.36 (0.57 – 3.24)        | 1.26 (0.51 – 3.09)                |
| Age 50-59 years                                                           | 15/72 (20.8%)                      | 1.67 (0.72 – 3.83)        | 1.91 (0.79 – 4.62)                |
| Age ≥ 60 years                                                            | 33/117 (28.2%)                     | <b>2.49 (1.20 – 5.16)</b> | <b>2.64 (1.21 – 5.75)</b>         |
| <i>P</i> for trend *                                                      | <b>0.009</b>                       | /                         | /                                 |
| BMI **                                                                    |                                    |                           |                                   |
| < 25 kg/m <sup>2</sup>                                                    | 46/219 (21.0%)                     | 1.00 (Reference)          | 1.00 (Reference)                  |
| 25 - 29.9 kg/m <sup>2</sup>                                               | 20/92 (21.7%)                      | 1.04 (0.58 – 1.89)        | 0.96 (0.52 – 1.78)                |
| ≥ 30 kg/m <sup>2</sup>                                                    | 2/18 (11.1%)                       | 0.47 (0.10 – 2.12)        | 0.47 (0.10 – 2.15)                |
| <i>P</i> for trend *                                                      | 0.570                              | /                         | /                                 |
| Vaccination status **                                                     |                                    |                           |                                   |
| Unvaccinated                                                              | 3/22 (13.6%)                       | 1.00 (Reference)          | 1.00 (Reference)                  |
| 1-2 doses                                                                 | 42/191 (22.0%)                     | 1.79 (0.50 – 6.32)        | 2.03 (0.54 – 7.59)                |
| Boosted dose                                                              | 27/129 (20.9%)                     | 1.67 (0.46 – 6.09)        | 1.90 (0.49 – 7.35)                |
| <i>P</i> for trend *                                                      | 0.739                              | /                         | /                                 |
| Time from first positive test for SARS-CoV-2 to first dose of study drugs |                                    |                           |                                   |
| < 3 days                                                                  | 64 / 280 (22.9%)                   | 1.00 (Reference)          | 1.00 (Reference)                  |
| ≥ 3 days                                                                  | 8 / 65 (12.3%)                     | 0.47 (0.22 – 1.05)        | 0.44 (0.20 – 1.00)                |
| <i>P</i> value                                                            | 0.059                              | /                         | /                                 |

\* Cochran-Armitage test for trend.

\*\* Missing data from 16 participants for BMI and from 3 participants for vaccination status.

# Odds ratios were mutually adjusted for variables in the table and treatment groups.

BMI, body-mass index; CI, confidence interval; OR, odds ratio; VLR, viral load rebound.

**eTable 3.** Post-Hoc Analysis of Characteristics Associated With Viral Rebound Rate in VV116 Group

| Characteristics                                                                  | No. of VLR/No. of participants (%) | Unadjusted OR (95% CI) | Adjusted OR (95% CI) <sup>#</sup> |
|----------------------------------------------------------------------------------|------------------------------------|------------------------|-----------------------------------|
| <b>Doses of study drug</b>                                                       |                                    |                        |                                   |
| < 5                                                                              | 2/13 (15.4%)                       | 1.00 (Reference)       | 1.00 (Reference)                  |
| 5-7                                                                              | 3/13 (23.1%)                       | 1.19 (0.31 – 4.61)     | 1.30 (0.30 – 5.73)                |
| 8-10                                                                             | 28/139 (20.1%)                     | 0.72 (0.15 – 3.44)     | 0.71 (0.13 – 3.87)                |
| <i>P</i> for trend *                                                             | 0.789                              | /                      | /                                 |
| <b>Age categories</b>                                                            |                                    |                        |                                   |
| Age < 40 years                                                                   | 5/32 (15.6%)                       | 1.00 (Reference)       | 1.00 (Reference)                  |
| Age 40-49 years                                                                  | 6/33 (18.2%)                       | 1.64 (0.45 – 5.95)     | 1.55 (0.39 – 6.17)                |
| Age 50-59 years                                                                  | 8/31 (25.8%)                       | 2.57 (0.75 – 8.83)     | 2.94 (0.79 – 10.93)               |
| Age ≥ 60 years                                                                   | 14/59 (23.7%)                      | 2.30 (0.76 – 6.98)     | 2.46 (0.74 – 8.12)                |
| <i>P</i> for trend *                                                             | 0.121                              | /                      | /                                 |
| <b>BMI **</b>                                                                    |                                    |                        |                                   |
| < 25 kg/m <sup>2</sup>                                                           | 23/106 (21.7%)                     | 1.00 (Reference)       | 1.00 (Reference)                  |
| 25 - 29.9 kg/m <sup>2</sup>                                                      | 7/41 (17.1%)                       | 0.74 (0.29 – 1.89)     | 0.67 (0.25 – 1.82)                |
| ≥ 30 kg/m <sup>2</sup>                                                           | 1/10 (10.0%)                       | 0.40 (0.05 – 3.33)     | 0.40 (0.05 – 3.53)                |
| <i>P</i> for trend *                                                             | 0.312                              | /                      | /                                 |
| <b>Vaccination status **</b>                                                     |                                    |                        |                                   |
| Unvaccinated                                                                     | 2/12 (16.7%)                       | 1.00 (Reference)       | 1.00 (Reference)                  |
| 1-2 doses                                                                        | 16/91 (17.6%)                      | 1.07 (0.21 – 5.34)     | 1.19 (0.22 – 6.56)                |
| Boosted dose                                                                     | 15/61 (24.6%)                      | 1.63 (0.32 – 8.29)     | 1.97 (0.35 – 11.10)               |
| <i>P</i> for trend *                                                             | 0.305                              | /                      | /                                 |
| <b>Time from first positive test for SARS-CoV-2 to first dose of study drugs</b> |                                    |                        |                                   |
| < 3 days                                                                         | 29/134 (21.6%)                     | 1.00 (Reference)       | 1.00 (Reference)                  |
| ≥ 3 days                                                                         | 4/31 (12.9%)                       | 0.54 (0.17 – 1.66)     | 0.58 (0.18 – 1.89)                |
| <i>P</i> value                                                                   | 0.273                              | /                      | /                                 |

\* Cochran-Armitage test for trend.

\*\* Missing data from 16 participants for BMI and from 3 participants for vaccination status.

# Odds ratios were mutually adjusted for variables in the table.

BMI, body-mass index; CI, confidence interval; OR, odds ratio; VLR, viral load rebound.

**eTable 4.** Post-Hoc Analysis of Characteristics Associated With Viral Rebound Rate in Nirmatrelvir-Ritonavir Group

| Characteristics                                                                  | No. of VLR/No. of participants (%) | Unadjusted OR (95% CI)    | Adjusted OR (95% CI) <sup>#</sup> |
|----------------------------------------------------------------------------------|------------------------------------|---------------------------|-----------------------------------|
| <b>Doses of study drug</b>                                                       |                                    |                           |                                   |
| < 5                                                                              | 3/19 (15.8%)                       | 1.00 (Reference)          | 1.00 (Reference)                  |
| 5-7                                                                              | 3/9 (33.3%)                        | 1.80 (0.43 – 7.60)        | 0.90 (0.15 – 5.36)                |
| 8-10                                                                             | 33/152 (21.7%)                     | 0.68 (0.19 – 2.46)        | 0.76 (0.19 – 3.07)                |
| <i>P</i> for trend *                                                             | 0.736                              | /                         | /                                 |
| <b>Age categories</b>                                                            |                                    |                           |                                   |
| Age < 40 years                                                                   | 7/46 (15.2%)                       | 1.00 (Reference)          | 1.00 (Reference)                  |
| Age 40-49 years                                                                  | 6/35 (17.1%)                       | 1.15 (0.35 – 3.80)        | 1.08 (0.32 – 3.64)                |
| Age 50-59 years                                                                  | 7/41 (17.1%)                       | 1.15 (0.37 – 3.60)        | 1.20 (0.34 – 4.16)                |
| Age ≥ 60 years                                                                   | 19/58 (32.8%)                      | <b>2.71 (1.03 – 7.19)</b> | <b>3.00 (1.05 – 8.58)</b>         |
| <i>P</i> for trend *                                                             | <b>0.032</b>                       | /                         | /                                 |
| <b>BMI **</b>                                                                    |                                    |                           |                                   |
| < 25 kg/m <sup>2</sup>                                                           | 23/113 (20.4%)                     | 1.00 (Reference)          | 1.00 (Reference)                  |
| 25 - 29.9 kg/m <sup>2</sup>                                                      | 13/51 (25.5%)                      | 1.34 (0.61 – 2.92)        | 1.36 (0.58 – 3.16)                |
| ≥ 30 kg/m <sup>2</sup>                                                           | 1/8 (12.5%)                        | 0.56 (0.07 – 4.77)        | 0.64 (0.07 – 5.74)                |
| <i>P</i> for trend *                                                             | 0.850                              | /                         | /                                 |
| <b>Vaccination status **</b>                                                     |                                    |                           |                                   |
| Unvaccinated                                                                     | 1/10 (10.0%)                       | 1.00 (Reference)          | 1.00 (Reference)                  |
| 1-2 doses                                                                        | 26/100 (26.0%)                     | 3.16 (0.38 – 26.18)       | 3.78 (0.42 – 34.29)               |
| Boosted dose                                                                     | 12/68 (17.6%)                      | 1.93 (0.22 – 16.69)       | 2.19 (0.23 – 20.87)               |
| <i>P</i> for trend *                                                             | 0.591                              | /                         | /                                 |
| <b>Time from first positive test for SARS-CoV-2 to first dose of study drugs</b> |                                    |                           |                                   |
| < 3 days                                                                         | 35/146 (24.0%)                     | 1.00 (Reference)          | 1.00 (Reference)                  |
| ≥ 3 days                                                                         | 4/34 (11.8%)                       | 0.42 (0.14 – 1.28)        | 0.37 (0.12 – 1.20)                |
| <i>P</i> value                                                                   | 0.120                              | /                         | /                                 |

\* Cochran-Armitage test for trend.

\*\* Missing data from 16 participants for BMI and from 3 participants for vaccination status.

# Odds ratios were mutually adjusted for variables in the table.

BMI, body-mass index; CI, confidence interval; OR, odds ratio; VLR, viral load rebound.

**eTable 5.** Adverse Events in the Safety Analysis Set

| Adverse events                                                              | VV116<br>(N = 166) | Nirmatrelvir–<br>ritonavir<br>(N = 187) | p value |
|-----------------------------------------------------------------------------|--------------------|-----------------------------------------|---------|
| AE leading to discontinuation of study drugs                                | 2 (1.2%)           | 6 (3.2%)                                | 0.291*  |
| Serious adverse events                                                      | 4 (2.4%)           | 6 (3.2%)                                | 0.755*  |
| Hospitalization due to pneumonia                                            | 3 (1.8%)           | 5 (2.7%)                                | 0.727*  |
| Hospitalization due to pulmonary embolism                                   | 0 (0%)             | 1 (0.5%)                                | /       |
| Hospitalization and death due to pneumonia                                  | 1 (0.6%)           | 0 (0%)                                  | /       |
| SAEs considered by the investigator to be related to the assigned treatment | 0 (0%)             | 0 (0%)                                  | /       |

\* Fisher's exact test was used.

AE, adverse event; SAE, serious adverse event.



**eTable 6.** Whole-Genome Sequencing of SARS-CoV-2 in 24 Cases

| No. | Visit Day | Input ReadsNumber | Map&Trimmed readsNumber | medianDepth | # SNPs | # INDELs | Nextclade clade | Nextclade_pango | fullName      | QC.genomeCoverage | QC.overall Status | QC.missing Data.status | QC. totalMissing |
|-----|-----------|-------------------|-------------------------|-------------|--------|----------|-----------------|-----------------|---------------|-------------------|-------------------|------------------------|------------------|
| 1   | D0        | 31855792          | 14000445                | 25796       | 79     | 7        | 22B (Omicron)   | BF.7.14         | BA.5.2.1.7.14 | 0.981139016       | mediocre          | good                   | 564              |
|     | D56       | 61051266          | 15985189                | 17760       | 78     | 6        | 22B (Omicron)   | BF.7.14         | BA.5.2.1.7.14 | 0.981540314       | mediocre          | good                   | 552              |
| 2   | D0        | 16342792          | 12720541                | 51003       | 78     | 5        | 22B (Omicron)   | DY.1            | BA.5.2.48.1   | 0.997291242       | good              | good                   | 81               |
|     | D8        | 15811318          | 11317480                | 43860       | 76     | 5        | 22B (Omicron)   | DY.1            | BA.5.2.48.1   | 0.997592215       | good              | good                   | 72               |
| 3   | D0        | 15305316          | 8357486                 | 25208       | 81     | 5        | 22B (Omicron)   | BA.5.2.48       | BA.5.2.48     | 0.986790623       | good              | good                   | 395              |
|     | D8        | 13086106          | 4514394                 | 9581        | 94     | 5        | 22B (Omicron)   | BA.5.2.48       | BA.5.2.48     | 0.990301976       | good              | good                   | 290              |
| 4   | D0        | 13270804          | 8024455                 | 28330       | 80     | 6        | 22B (Omicron)   | BA.5.2.48       | BA.5.2.48     | 0.997558773       | good              | good                   | 73               |
|     | D10       | 14774246          | 8276812                 | 29738       | 79     | 5        | 22B (Omicron)   | BA.5.2.48       | BA.5.2.48     | 0.997458449       | good              | good                   | 76               |
| 5   | D0        | 14660420          | 11356336                | 43192       | 75     | 5        | 22B (Omicron)   | BF.7.14         | BA.5.2.1.7.14 | 0.996889944       | good              | good                   | 93               |
|     | D12       | 17787846          | 13834385                | 55731       | 76     | 5        | 22B (Omicron)   | BF.7.14         | BA.5.2.1.7.14 | 0.997525332       | good              | good                   | 74               |
| 6   | D0        | 12175772          | 7404962                 | 22426       | 79     | 5        | 22B (Omicron)   | BF.7.14         | BA.5.2.1.7.14 | 0.985620172       | mediocre          | good                   | 430              |
|     | D14       | 14286366          | 6499887                 | 14062       | 81     | 11       | 22B (Omicron)   | BF.7.14         | BA.5.2.1.7.14 | 0.925559308       | mediocre          | mediocre               | 2226             |
| 7   | D0        | 12296180          | 8291514                 | 31728       | 87     | 4        | 22B (Omicron)   | BA.5.2          | BA.5.2        | 0.996254556       | good              | good                   | 112              |
|     | D10       | 13425728          | 7821073                 | 24708       | 85     | 4        | 22B (Omicron)   | BA.5.2          | BA.5.2        | 0.995518844       | good              | good                   | 134              |
| 8   | D0        | 13957866          | 10452467                | 41179       | 76     | 5        | 22B (Omicron)   | BF.7.14         | BA.5.2.1.7.14 | 0.992542554       | mediocre          | good                   | 223              |
|     | D8        | 16038350          | 10289130                | 37377       | 75     | 5        | 22B (Omicron)   | BF.7.14         | BA.5.2.1.7.14 | 0.996020466       | mediocre          | good                   | 119              |
| 9   | D0        | 14120836          | 5794542                 | 15000       | 79     | 5        | 22B (Omicron)   | BA.5.2.48       | BA.5.2.48     | 0.974751697       | good              | good                   | 755              |
|     | D8        | 10369112          | 5946656                 | 12257       | 85     | 7        | 22B (Omicron)   | BA.5.2.48       | BA.5.2.48     | 0.934254088       | mediocre          | mediocre               | 1966             |
| 10  | D0        | 17277912          | 12368425                | 47837       | 75     | 5        | 22B (Omicron)   | BF.7.14         | BA.5.2.1.7.14 | 0.997692539       | good              | good                   | 69               |
|     | D10       | 16740982          | 10166771                | 39973       | 75     | 5        | 22B (Omicron)   | BF.7.14         | BA.5.2.1.7.14 | 0.997625656       | mediocre          | good                   | 71               |
| 11  | D0        | 19083484          | 14700246                | 54668       | 78     | 5        | 22B (Omicron)   | BF.7.14         | BA.5.2.1.7.14 | 0.997558773       | good              | good                   | 73               |
|     | D8        | 7716306           | 5157450                 | 17855       | 76     | 5        | 22B (Omicron)   | BF.7.14         | BA.5.2.1.7.14 | 0.982376350       | good              | good                   | 527              |
| 12  | D0        | 19961062          | 15468947                | 60175       | 75     | 5        | 22B (Omicron)   | BA.5.2.48       | BA.5.2.48     | 0.996020466       | good              | good                   | 119              |

|    |     |          |          |       |    |   |               |           |               |             |          |      |     |
|----|-----|----------|----------|-------|----|---|---------------|-----------|---------------|-------------|----------|------|-----|
|    | D8  | 15205132 | 9803131  | 37670 | 76 | 5 | 22B (Omicron) | BA.5.2.48 | BA.5.2.48     | 0.995987025 | good     | good | 120 |
| 13 | D0  | 15536844 | 11490699 | 43787 | 77 | 5 | 22B (Omicron) | BF.7.14   | BA.5.2.1.7.14 | 0.997592215 | mediocre | good | 72  |
|    | D8  | 16068514 | 11793022 | 44025 | 77 | 5 | 22B (Omicron) | BF.7.14   | BA.5.2.1.7.14 | 0.997558773 | good     | good | 73  |
| 14 | D0  | 13579524 | 8534615  | 30344 | 87 | 5 | 22B (Omicron) | BA.5.2.48 | BA.5.2.48     | 0.995987025 | good     | good | 120 |
|    | D10 | 14346304 | 10185351 | 36713 | 84 | 5 | 22B (Omicron) | BA.5.2.48 | BA.5.2.48     | 0.995987025 | good     | good | 120 |
| 15 | D0  | 17464250 | 11972896 | 47189 | 76 | 5 | 22B (Omicron) | BF.7.14   | BA.5.2.1.7.14 | 0.996254556 | mediocre | good | 112 |
|    | D8  | 12638434 | 9202896  | 36385 | 77 | 5 | 22B (Omicron) | BF.7.14   | BA.5.2.1.7.14 | 0.997926629 | good     | good | 62  |
| 16 | D0  | 16068932 | 11301969 | 44393 | 80 | 5 | 22B (Omicron) | BA.5.2.50 | BA.5.2.50     | 0.997525332 | good     | good | 74  |
|    | D10 | 15385784 | 11135724 | 42311 | 80 | 5 | 22B (Omicron) | BA.5.2.50 | BA.5.2.50     | 0.997190917 | good     | good | 84  |
| 17 | D0  | 11062114 | 8061335  | 30153 | 79 | 5 | 22B (Omicron) | DY.1      | BA.5.2.48.1   | 0.995987025 | good     | good | 120 |
|    | D8  | 11995450 | 7342031  | 25955 | 77 | 5 | 22B (Omicron) | DY.1      | BA.5.2.48.1   | 0.986021469 | good     | good | 418 |
| 18 | D0  | 7433278  | 4784006  | 18245 | 76 | 6 | 22B (Omicron) | DY.1      | BA.5.2.48.1   | 0.995987025 | good     | good | 120 |
|    | D10 | 16348026 | 11800658 | 41887 | 79 | 6 | 22B (Omicron) | DY.1      | BA.5.2.48.1   | 0.995987025 | good     | good | 120 |
| 19 | D0  | 17360822 | 12974962 | 51691 | 77 | 5 | 22B (Omicron) | BA.5.2.48 | BA.5.2.48     | 0.997558773 | good     | good | 73  |
|    | D8  | 12236636 | 9324772  | 36826 | 76 | 5 | 22B (Omicron) | BA.5.2.48 | BA.5.2.48     | 0.997725981 | good     | good | 68  |
| 20 | D0  | 15523728 | 11037980 | 42123 | 75 | 5 | 22B (Omicron) | BF.7.14   | BA.5.2.1.7.14 | 0.997859747 | mediocre | good | 64  |
|    | D8  | 17249408 | 11946432 | 45470 | 75 | 5 | 22B (Omicron) | BF.7.14   | BA.5.2.1.7.14 | 0.996254556 | mediocre | good | 112 |
| 21 | D0  | 17205108 | 13335392 | 49990 | 77 | 5 | 22B (Omicron) | BA.5.2.48 | BA.5.2.48     | 0.997592215 | good     | good | 72  |
|    | D16 | 13155656 | 9754024  | 36568 | 76 | 5 | 22B (Omicron) | BA.5.2.48 | BA.5.2.48     | 0.997625656 | good     | good | 71  |
| 22 | D0  | 19532768 | 14040370 | 51141 | 76 | 6 | 22B (Omicron) | BF.7.14   | BA.5.2.1.7.14 | 0.997625656 | good     | good | 71  |
|    | D12 | 8079472  | 6108908  | 21967 | 78 | 6 | 22B (Omicron) | BF.7.14   | BA.5.2.1.7.14 | 0.992542554 | good     | good | 223 |
| 23 | D0  | 20355556 | 15278583 | 57637 | 77 | 6 | 22B (Omicron) | BA.5.2.48 | BA.5.2.48     | 0.997792864 | good     | good | 66  |
|    | D8  | 16689682 | 12500396 | 47018 | 78 | 6 | 22B (Omicron) | BA.5.2.48 | BA.5.2.48     | 0.997592215 | good     | good | 72  |
| 24 | D0  | 13156890 | 6925313  | 21832 | 78 | 5 | 22B (Omicron) | BA.5.2.48 | BA.5.2.48     | 0.975320202 | good     | good | 738 |
|    | D10 | 11659676 | 7254342  | 20544 | 80 | 5 | 22B (Omicron) | BA.5.2.48 | BA.5.2.48     | 0.968665351 | mediocre | good | 937 |

**eFigure 1.** Enrollment of Study Participants

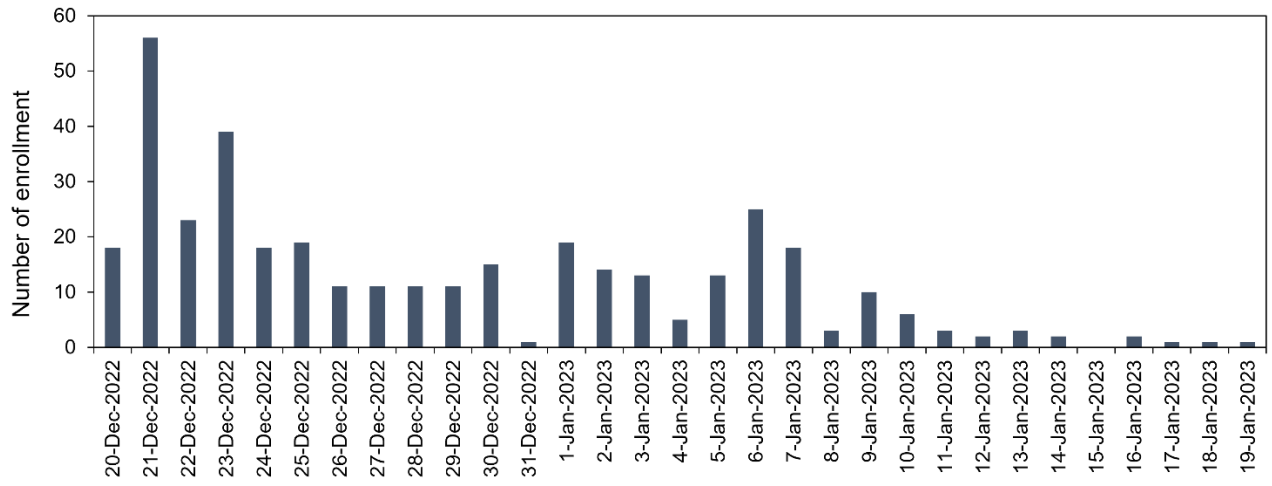

**eFigure 2.** Median (Interquartile Range) Score for COVID-19–Related Target Symptoms in Patients Receiving VV116 or Nirmatrelvir-Ritonavir by Follow-Up Days

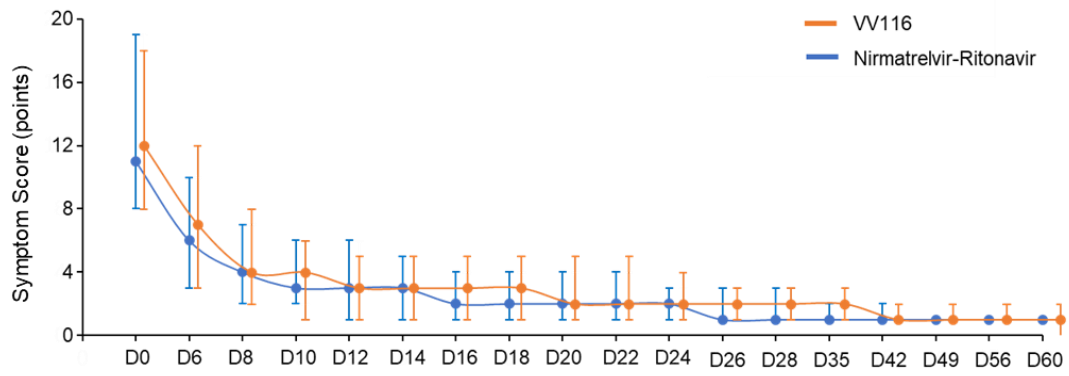

**eFigure 3.** Trajectories of Viral Copy Numbers (log10-Transformed) by Groups of Rebound and Not Rebound

Generalized additive mixed models were used to fit the trajectories of log-transformed viral RNA copy numbers per mL plus 1 (because many data points are 0) by groups of rebound and not rebound. Solid lines represent smoothed fitted viral copy numbers (log10-transformed) and grey areas represent point-related 95% confidence intervals.

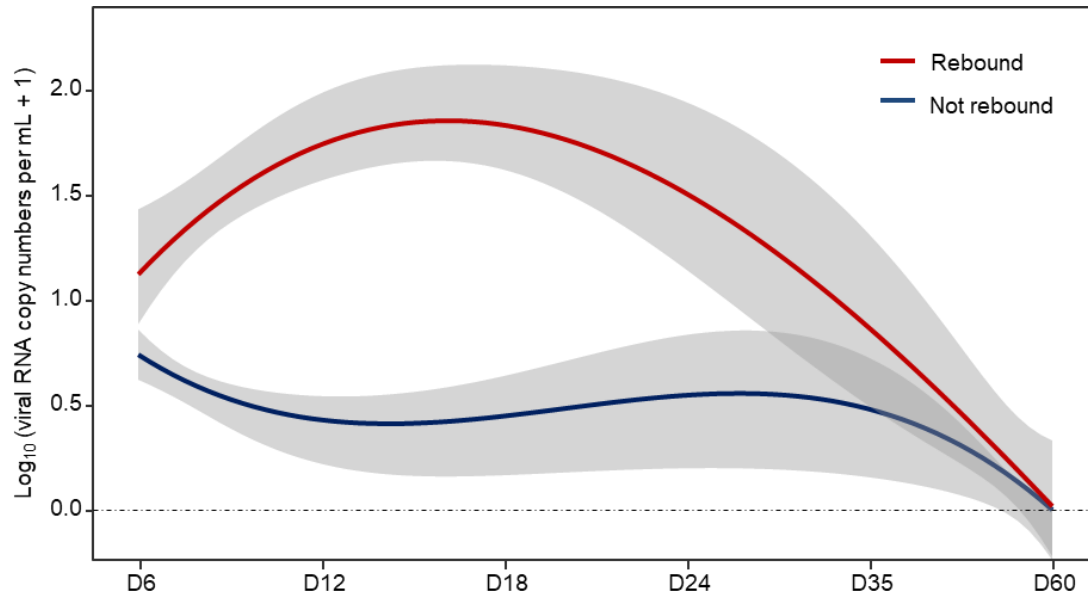

**eFigure 4. SARS-CoV-2 Variants, Ct Values, and Symptom Scores in 24 Cases**

| No. | Test                   | D0     | D6    | D8    | D10   | D12   | D14   | D16   | D18   | D20   | D22   | D56   |                                                                                                            |
|-----|------------------------|--------|-------|-------|-------|-------|-------|-------|-------|-------|-------|-------|------------------------------------------------------------------------------------------------------------|
| 1   | Virant                 | BF.7   |       |       |       |       |       |       |       |       |       | BF.7  | SARS-CoV-2 variant<br>Reduction in Ct value >=1.5<br>Symptom aggregation<br>No progression<br>Imputed data |
|     | Ct Value               | 30.20  | 37.23 | (-)   | (-)   | (-)   | (-)   | (-)   | (-)   | (-)   | (-)   | 32.74 |                                                                                                            |
|     | Symptom Score (points) | 9      | 8     | 5     | 5     | 6     | 3     | 1     | 1     | 1     | 1     | 1     |                                                                                                            |
| 2   | Virant                 | BA.5.2 |       |       |       |       |       |       |       |       |       |       |                                                                                                            |
|     | Ct Value               | 25.07  | (-)   | 34.96 | (-)   | (-)   | (-)   | (-)   | (-)   | (-)   | (-)   | (-)   |                                                                                                            |
|     | Symptom Score (points) | 6      | 1     | 0     | 0     | 1     | 0     | 0     | 0     | 0     | 0     | 0     |                                                                                                            |
| 3   | Virant                 | BA.5.2 |       |       |       |       |       |       |       |       |       |       |                                                                                                            |
|     | Ct Value               | 29.19  | (-)   | 34.57 | 36.63 | (-)   | (-)   | (-)   | (-)   | (-)   | (-)   | (-)   |                                                                                                            |
|     | Symptom Score (points) | 8      | 4     | 5     | 3     | 6     | 5     | 3     | 1     | 2     | 3     | 1     |                                                                                                            |
| 4   | Virant                 | BA.5.2 |       |       |       |       |       |       |       |       |       |       |                                                                                                            |
|     | Ct Value               | 27.61  | (-)   | 31.64 | 29.27 | 27.90 | (-)   | (-)   | (-)   | (-)   | (-)   | (-)   |                                                                                                            |
|     | Symptom Score (points) | 6      | 14    | 6     | 12    | 10    | 9     | 10    | 9     | 9     | 9     | 5     |                                                                                                            |
| 5   | Virant                 | BF.7   |       |       |       |       |       |       |       |       |       |       |                                                                                                            |
|     | Ct Value               | 24.00  | 34.98 | 33.80 | 32.62 | 31.44 | (-)   | (-)   | (-)   | (-)   | (-)   | (-)   |                                                                                                            |
|     | Symptom Score (points) | 24     | 26    | 14    | 10    | 4     | 3     | 6     | 3     | 3     | 2     | 2     |                                                                                                            |
| 6   | Virant                 | BF.7   |       |       |       |       |       |       |       |       |       |       |                                                                                                            |
|     | Ct Value               | 27.96  | (-)   | 23    | 19    | (-)   | 33.70 | (-)   | 33.13 | 35.64 | (-)   | (-)   |                                                                                                            |
|     | Symptom Score (points) | 25     | 14    | 23    | 19    | 13    | 16    | 15    | 10    | 14    | 9     | 9     |                                                                                                            |
| 7   | Virant                 | BA.5.2 |       |       |       |       |       |       |       |       |       |       |                                                                                                            |
|     | Ct Value               | 27.29  | (-)   | 31.39 | 25.20 | 29.43 | 29.18 | (-)   | (-)   | (-)   | (-)   | (-)   |                                                                                                            |
|     | Symptom Score (points) | 13     | 10    | 7     | 7     | 8     | 8     | 5     | 8     | 6     | 5     | 0     |                                                                                                            |
| 8   | Virant                 | BF.7   |       |       |       |       |       |       |       |       |       |       |                                                                                                            |
|     | Ct Value               | 26.77  | (-)   | 31.43 | (-)   | (-)   | (-)   | (-)   | (-)   | (-)   | (-)   | (-)   |                                                                                                            |
|     | Symptom Score (points) | 17     | 8     | 6     | 4     | 5     | 3     | 3     | 3     | 3     | 1     | 2     |                                                                                                            |
| 9   | Virant                 | BA.5.2 |       |       |       |       |       |       |       |       |       |       |                                                                                                            |
|     | Ct Value               | 32.86  | 29.19 | 23.71 | 34.04 | (-)   | 31.24 | (-)   | (-)   | (-)   | (-)   | (-)   |                                                                                                            |
|     | Symptom Score (points) | 14     | 7     | 3     | 2     | 2     | 2     | 2     | 1     | 1     | 1     | 1     |                                                                                                            |
| 10  | Virant                 | BF.7   |       |       |       |       |       |       |       |       |       |       |                                                                                                            |
|     | Ct Value               | 27.26  | 33.92 | (-)   | 23.19 | 37.38 | 38.02 | (-)   | (-)   | (-)   | (-)   | (-)   |                                                                                                            |
|     | Symptom Score (points) | 22     | 12    | 5     | 7     | 9     | 5     | 5     | 6     | 5     | 5     | 1     |                                                                                                            |
| 11  | Virant                 | BF.7   |       |       |       |       |       |       |       |       |       |       |                                                                                                            |
|     | Ct Value               | 23.49  | 35.68 | 34.19 | 29.37 | 36.89 | 36.70 | (-)   | (-)   | (-)   | (-)   | (-)   |                                                                                                            |
|     | Symptom Score (points) | 11     | 33    | 6     | 0     | 2     | 1     | 1     | 1     | 1     | 4     | 1     |                                                                                                            |
| 12  | Virant                 | BA.5.2 |       |       |       |       |       |       |       |       |       |       |                                                                                                            |
|     | Ct Value               | 24.02  | (-)   | 22.47 | (-)   | (-)   | (-)   | (-)   | (-)   | (-)   | (-)   | (-)   |                                                                                                            |
|     | Symptom Score (points) | 7      | 9     | 9     | 9     | 9     | 9     | 9     | 9     | 9     | 9     | 9     |                                                                                                            |
| 13  | Virant                 | BF.7   |       |       |       |       |       |       |       |       |       |       |                                                                                                            |
|     | Ct Value               | 22.94  | 34.63 | 28.12 | (-)   | (-)   | (-)   | (-)   | (-)   | (-)   | (-)   | (-)   |                                                                                                            |
|     | Symptom Score (points) | 14     | 26    | 7     | 8     | 8     | 3     | 4     | 3     | 2     | 3     | 2     |                                                                                                            |
| 14  | Virant                 | BA.5.2 |       |       |       |       |       |       |       |       |       |       |                                                                                                            |
|     | Ct Value               | 30.12  | (-)   | 33.01 | (-)   | (-)   | (-)   | (-)   | (-)   | (-)   | (-)   | (-)   |                                                                                                            |
|     | Symptom Score (points) | 19     | 13    | 13    | 13    | 13    | 3     | 7     | 3     | 7     | 7     | 1     |                                                                                                            |
| 15  | Virant                 | BF.7   |       |       |       |       |       |       |       |       |       |       |                                                                                                            |
|     | Ct Value               | 31.73  | 26.41 | 15.91 | 32.00 | 33.11 | 31.70 | (-)   | 35.53 | (-)   | (-)   | (-)   |                                                                                                            |
|     | Symptom Score (points) | 3      | 44    | 17    | 8     | 3     | 11    | 3     | 8     | 10    | 8     | 2     |                                                                                                            |
| 16  | Virant                 | BA.5.2 |       |       |       |       |       |       |       |       |       |       |                                                                                                            |
|     | Ct Value               | 23.96  | (-)   | 33.22 | (-)   | (-)   | (-)   | (-)   | (-)   | (-)   | (-)   | (-)   |                                                                                                            |
|     | Symptom Score (points) | 20     | 6     | 1     | 9     | 8     | 5     | 5     | 9     | 6     | 5     | 1     |                                                                                                            |
| 17  | Virant                 | BA.5.2 |       |       |       |       |       |       |       |       |       |       |                                                                                                            |
|     | Ct Value               | 27.11  | (-)   | 27.27 | 31.00 | (-)   | 31.47 | 21.19 | (-)   | (-)   | (-)   | (-)   |                                                                                                            |
|     | Symptom Score (points) | 15     | 1     | 1     | 1     | 5     | 2     | 2     | 0     | 0     | 0     | 0     |                                                                                                            |
| 18  | Virant                 | BA.5.2 |       |       |       |       |       |       |       |       |       |       |                                                                                                            |
|     | Ct Value               | 29.07  | (-)   | 34.42 | (-)   | (-)   | (-)   | (-)   | (-)   | (-)   | (-)   | (-)   |                                                                                                            |
|     | Symptom Score (points) | 13     | 6     | 5     | 5     | 7     | 6     | 3     | 3     | 3     | 3     | 1     |                                                                                                            |
| 19  | Virant                 | BA.5.2 |       |       |       |       |       |       |       |       |       |       |                                                                                                            |
|     | Ct Value               | 24.11  | 36.58 | 33.64 | (-)   | (-)   | (-)   | (-)   | (-)   | (-)   | (-)   | (-)   |                                                                                                            |
|     | Symptom Score (points) | 9      | 2     | 2     | 4     | 2     | 2     | 2     | 0     | 0     | 1     | 1     |                                                                                                            |
| 20  | Virant                 | BF.7   |       |       |       |       |       |       |       |       |       |       |                                                                                                            |
|     | Ct Value               | 24.54  | 29.79 | 27.02 | 34.41 | 25.46 | 27.04 | 26.27 | 35.05 | 27.66 | (-)   | (-)   |                                                                                                            |
|     | Symptom Score (points) | 0      | 17    | 18    | 10    | 11    | 11    | 7     | 11    | 8     | 6     | 1     |                                                                                                            |
| 21  | Virant                 | BA.5.2 |       |       |       |       |       |       |       |       |       |       |                                                                                                            |
|     | Ct Value               | 24.38  | 36.64 | (-)   | 36.65 | (-)   | (-)   | 34.18 | (-)   | (-)   | (-)   | (-)   |                                                                                                            |
|     | Symptom Score (points) | 17     | 0     | 3     | 3     | 0     | 2     | 0     | 0     | 0     | 0     | 0     |                                                                                                            |
| 22  | Virant                 | BF.7   |       |       |       |       |       |       |       |       |       |       |                                                                                                            |
|     | Ct Value               | 23.32  | 38.75 | (-)   | (-)   | 29.80 | 34.66 | 39.49 | (-)   | (-)   | 35.20 | (-)   |                                                                                                            |
|     | Symptom Score (points) | 10     | 8     | 3     | 3     | 1     | 0     | 0     | 1     | 0     | 1     | 1     |                                                                                                            |
| 23  | Virant                 | BA.5.2 |       |       |       |       |       |       |       |       |       |       |                                                                                                            |
|     | Ct Value               | 22.76  | (-)   | 33.40 | 33.68 | (-)   | (-)   | (-)   | (-)   | (-)   | (-)   | (-)   |                                                                                                            |
|     | Symptom Score (points) | 11     | 3     | 3     | 3     | 3     | 1     | 0     | 0     | 0     | 0     | 0     |                                                                                                            |
| 24  | Virant                 | BA.5.2 |       |       |       |       |       |       |       |       |       |       |                                                                                                            |
|     | Ct Value               | 29.00  | (-)   | 29.86 | (-)   | (-)   | (-)   | (-)   | (-)   | (-)   | (-)   | (-)   |                                                                                                            |
|     | Symptom Score (points) | 15     | 10    | 10    | 11    | 9     | 9     | 7     | 6     | 2     | 5     | 1     |                                                                                                            |
