# Supplementary material for: COVID-19 Rebound After VV116 vs Nirmatrelvir-Ritonavir Treatment: A Randomized Clinical Trial
Source: PubMed Central journal article supplement (PMC10938176; doi:10.1001/jamanetworkopen.2024.1765), 2024-03-13
Supplement: jamanetwopen-e241765-s003.pdf [file jamanetwopen-e241765-s003.pdf]

## Data Sharing Statement

Yang. COVID-19 Rebound After VV116 vs Nirmatrelvir-Ritonavir Treatment. *JAMA Netw Open*.  
Published March 13, 2024. doi:10.1001/jamanetworkopen.2024.1765

### Data

**Data available:** No

### Additional Information

**Explanation for why data not available:** Individual patient data will not be available to others as per the policy of Medical Ethics Committee of Ruijin Hospital.
